## ORIGINAL ARTICLE

# Comparison Between Automatic and Visual Scorings of REM Sleep Without Atonia for the Diagnosis of REM Sleep Behavior Disorder in Parkinson Disease

Michela Figorilli, MD<sup>1,2</sup>; Raffaele Ferri, MD<sup>3</sup>; Maurizio Zibetti, MD, PhD<sup>4</sup>; Patricia Beudin, MD<sup>5</sup>; Monica Puligheddu, MD, PhD<sup>2</sup>; Leonardo Lopiano, MD, PhD<sup>4</sup>; Alessandro Cicolin, MD<sup>6</sup>; Frank Durif, MD, PhD<sup>1,5</sup>; Ana Marques, MD<sup>1,5</sup>; Maria Livia Fantini, MD, PhD<sup>1,5</sup>

<sup>1</sup>EA 7280, Université Clermont Auvergne, Clermont-Ferrand, France; <sup>2</sup>Sleep Disorders Center - Neurophysiology Unit, University of Cagliari, Cagliari, Italy; <sup>3</sup>Department of Neurology, Oasi Institute for Research on Mental Retardation and Brain Aging (IRCCS), Troina, Italy; <sup>4</sup>Department of Neuroscience, University of Turin, Turin, Italy; <sup>5</sup>Department of Neurology, CHU Clermont-Ferrand, Clermont-Ferrand, France; <sup>6</sup>Sleep Disorders Center, Department of Neuroscience, University of Turin, Turin, Italy

**Study Objectives:** To compare three different methods, two visual and one automatic, for the quantification of rapid eye movement (REM) sleep without atonia (RSWA) in the diagnosis of REM sleep behavior disorder (RBD) in Parkinson's disease (PD) patients.

**Methods:** Sixty-two consecutive patients with idiopathic PD underwent video-polysomnographic recording and showed more than 5 minutes of REM sleep. The electromyogram during REM sleep was analyzed by means of two visual methods (Montréal and SINBAR) and one automatic analysis (REM Atonia Index or RAI). RBD was diagnosed according to standard criteria and a series of diagnostic accuracy measures were calculated for each method, as well as the agreement between them.

**Results:** RBD was diagnosed in 59.7% of patients. The accuracy (85.5%), receiver operating characteristic (ROC) area (0.833) and Cohen's K coefficient (0.688) obtained with RAI were similar to those of the visual parameters. Visual tonic parameters, alone or in combination with phasic activity, showed high values of accuracy (93.5–95.2%), ROC area (0.92–0.94), and Cohen's K (0.862–0.933). Similarly, the agreement between the two visual methods was very high, and the agreement between each visual methods and RAI was substantial. Visual phasic measures alone performed worse than all the other measures.

**Conclusion:** The diagnostic accuracy of RSWA obtained with both visual and automatic methods was high and there was a general agreement between methods. RAI may be used as the first line method to detect RSWA in the diagnosis of RBD in PD, together with the visual inspection of video-recorded behaviors, while the visual analysis of RSWA might be used in doubtful cases.

**Keywords:** REM Sleep without Atonia, REM Sleep Behavior Disorder, Parkinson Disease, REM sleep atonia Index, Montréal method, SINBAR method.

## Statement of Significance

The diagnosis of RBD in Parkinson's disease is often challenging, because of subclinical forms, but it may bring prognostic and therapeutic implications. A reliable quantification of REM sleep without atonia (RSWA) is critical in order to diagnose RBD, and various methods, either visual or automatic, have been developed. Visual methods are time-consuming and require specialized expertise. We compared the diagnostic accuracy of two widely used visual methods and one automatic, in the diagnosis of RBD in PD, finding a substantial agreement. The automatic method may be used as first line to detect RSWA in diagnosing RBD in PD, together with the inspection of video-recorded behaviors, while the visual analysis of RSWA might be used in doubtful cases.

## INTRODUCTION

Rapid eye movement (REM) sleep behavior disorder (RBD) is a parasomnia characterized by partial or complete loss of normal muscle atonia during REM sleep, associated with vivid dreams and dream-enacting behavior.<sup>1,2</sup> RBD is very common in patients affected by neurodegenerative diseases, belonging to the group of alpha-synucleinopathies, namely Parkinson's disease (PD), Multiple System Atrophy, and Dementia with Lewy bodies.<sup>3–7</sup> Several lines of evidence indicate that RBD in PD is a marker of a more widespread neurodegenerative process, particularly associated to an increased risk for cognitive decline.<sup>8</sup> Therefore, the correct identification of RBD in PD may bear important prognostic implications for patients and it might become critical when neuroprotective and disease modifying therapies will hopefully be available. REM sleep without atonia (RSWA) is the polysomnographic (PSG) hallmark for the diagnosis of RBD, and consists of sustained (tonic) loss of normal muscle atonia during REM sleep, and/or intermittent (phasic) excessive electromyogram (EMG) activity during REM sleep.

A reliable quantification of RSWA is critical in order to diagnose RBD, and various methods to assess motor activity during REM sleep have been developed. The first and widely accepted visual scoring method to quantify RSWA was originally developed by Lapierre and Montplaisir<sup>9,10</sup> (here referred to as the Montréal method) and subsequently validated in 2010 in a study

investigating a sample of eighty idiopathic RBD patients.<sup>10</sup> Authors showed that the presence of >30% of 20-second epochs containing tonic EMG activity led to a correct classification of 82% of patients, while >15% of 2-second mini-epoch containing phasic EMG activity led to a correct classification of 84% of them.<sup>9</sup> The same method showed that most PD patients with RBD have >20% of 20-second epochs containing tonic EMG activity.<sup>11</sup> The Montréal method has also been shown to perform similarly if 30-second epochs are used.<sup>12</sup>

Moreover, the Barcelona and Innsbruck groups, known as SINBAR group, performed a study comparing RSWA assessed in 11 different body muscles, and in different combinations, in a group of 30 RBD patients including 15 PD.<sup>13</sup> Authors found that a montage including upper limb plus chin EMG derivations better differentiated RBD patients from control subjects than chin alone.<sup>13</sup> Specifically, among other measures, a cut-off of >32% of 3-second REM sleep epochs containing the combination of any (either tonic or phasic) chin EMG activity and bilateral Flexor Digitorum Superficialis (FDS) phasic EMG activity brought the best discriminative power.<sup>13</sup>

More recently, based on data published by the SINBAR group,<sup>13–16</sup> a cut-off value of 27% of 30-second epochs of REM sleep containing any (either tonic or phasic) chin EMG activity combined with bilateral FDS EMG phasic activity, was indicated to be the most current evidence-based data for detecting

RSWA in the diagnosis of RBD by the American Academy of Sleep Medicine (AASM), as mentioned in the International Classification of Sleep Disorders third edition (ICSD-3).<sup>17</sup> However, manual-visual scoring is time consuming and requires specialized expertise, making it little convenient in the clinical practice. Additionally, these methods have been validated only in small cohorts of PD patients.

Recently, an automatic scoring algorithm, also known as the REM sleep Atonia Index (RAI), has been developed in order to overcome these limits.<sup>18,19</sup> RAI showed a good sensitivity, specificity, and correct classification, with general agreement between methods and Cohen's kappa values in the "good" range when compared with the Montréal method in a recent study including seventy-four idiopathic RBD patients.<sup>12</sup> So far, no study has compared the accuracy, sensitivity, and specificity of RSWA measures obtained with the three methods, namely the automated and the manual-visual ones, in patients with PD.

Thus, the aims of this present study were: (1) to assess the concordance of the two visual scoring methods for RSWA, namely the Montréal<sup>10</sup> and the SINBAR<sup>13</sup> approaches, in patients with PD and (2) to compare the RAI automated method<sup>18</sup> with the two visual scoring methods, in order to assess their correct classification accuracy and reciprocal agreement, as well as their role in the clinical diagnosis of RBD in PD.

## SUBJECTS AND METHODS

### Subjects

Seventy-three (44 male, 29 female, mean age  $64.10 \pm 8.47$  years) non-demented PD patients, consecutively seen at two Movement Disorder Centers, namely the University Hospital in Clermont-Ferrand, France ( $n = 63$ ), and the Le Molinette University Hospital in Turin, Italy ( $n = 10$ ), for their routine evaluation, were recruited. The inclusion criterion was the diagnosis of idiopathic PD based on the United Kingdom PD Society Brain Bank Criteria.<sup>20</sup> Exclusion criteria were the presence of alternative causes of parkinsonism, a concomitant dementia (defined by a score  $<26$  in the Mini Mental State Examination, MMSE), the presence of a psychiatric disease according to the Diagnostic Statistical Manual (DSM-V), the use of device aided therapy, such as subcutaneous Apomorphine infusion, intra-duodenal gel infusion or deep brain stimulation. RBD was either diagnosed or ruled out according to the ICSD-3 criteria.<sup>17</sup> Patients were examined by a neurologist expert in Sleep Medicine (MLF, MZ) who conducted an in-depth interview, focused on RBD history and features. PD history and symptoms, as well as treatment data were collected by neurologist expert in movement disorders (AM, FD, MZ). The Total Levodopa Equivalent Daily Dose (LEDD), together with the Dopamine Agonist (DA) Levodopa Equivalent Daily Dose (DA-LEDD) were calculated according to Tomlinson et al.<sup>21</sup> The Ethical committee of each center (Clermont-Ferrand, France; Turin, Italy) approved the study and all patients gave written informed consent, according to the Declaration of Helsinki.

### PSG Recordings

All patients underwent one full-night attended video-polysomnography (video-PSG) recording in sleep laboratory with digital

polysomnography according to the AASM recommendations.<sup>22</sup> Video-PSG was performed with digitally synchronized videography and the following montage was employed: electroencephalographic leads (F3-A2, F4-A1, C3-A2, C4-A1, O1-A2, O2-A1), left and right electrooculography (EOG) channels, bilateral surface EMG channels (submental, FDS on upper limbs, and tibialis anterior on lower limbs), and electrocardiography. The respiratory analysis included nasal airflow, which was recorded by both thermistor and nasal pressure sensor, thoracic, and abdominal respiratory effort, oxygen saturation recording by cutaneous finger pulse-oxymeter and microphone. Patients were asked to sleep uncovered in order to improve the detection of motor activity, but a light sheet could be allowed for their comfort.

Sleep stages were scored according to AASM criteria,<sup>22</sup> with allowance to chin EMG muscle tone during REM sleep. The following sleep data were collected for descriptive purpose: total bed time, total sleep time, sleep efficiency, sleep latency, wake after sleep onset (W), number of REM sleep episode, percentage of time in each sleep stage ( $N1$ ,  $N2$ ,  $N3$ ,  $R$ ), arousal index, periodic limb movements index, Apnea-hypopnea index, oxygen-desaturation index, arousal index.

### Diagnosis of RBD

The diagnosis of RBD was made according to the ICSD-3,<sup>17</sup> including a quantitative measure of RSWA, namely "any chin EMG activity, tonic and/or phasic, combined with bilateral phasic activity of the flexor digitorum superficialis (FDS) muscle" in  $\geq 27\%$  of REM sleep scored in 30-second epochs. The rationale to choose this cut-off, based on the SINBAR method,<sup>16</sup> as reference standard, relies on the fact that the latter has been included in the ICSD-3 "as the most current evidence-based data for detecting RSWA in the evaluation of RBD, reliably distinguishing RBD patients from controls." Patients were excluded from the analysis if they had spent less than 5 minutes in REM sleep, since this REM duration was believed to be insufficient for a reliable assessment of RSWA. Each video-recorded REM sleep period was carefully analyzed in order to detect any motor behaviors or sleep vocalizations referable to RBD, such as violent and non-violent motor complex activity.

### RSWA Visual Scoring Methods

The manual-visual scoring of RSWA was performed according to two previously published methods, the Montréal,<sup>9,10</sup> adapted to 30-second epochs,<sup>12</sup> and the SINBAR method.<sup>13,14,16</sup> The EMG activity of the chin and bilateral FDS were analyzed. REM sleep epochs were carefully examined for artifacts, and increases in EMG tone caused by respiratory arousal were excluded. The minimum amplitude of EMG activity during non-REM (NREM) sleep was considered as the background EMG activity for each patient. The EMG signal was analyzed with a notch filter at 50 Hz and rectified. Visual scoring was performed by a single sleep-specialist scorer (MF), who was blinded to RBD history.

### The Montréal Method

According to the method described elsewhere,<sup>9,10</sup> adapted to 30-second epochs, each epoch was scored as "tonic" when

the increased sustained EMG activity was present in more than 50% of the 30-second epoch duration, with an amplitude at least twice the background EMG muscle tone, or more than 10  $\mu$ V; otherwise epochs were scored as atonic. Tonic EMG density represented the percentage of 30-second epoch scored as tonic. Phasic chin EMG activity was scored dividing each 30-second epoch into 2-second mini-epochs; the phasic EMG activity can be scored both in atonic and tonic epochs. Phasic chin EMG density represented the percentage of 2-second mini-epochs containing EMG events lasting 0.1–10 seconds, with amplitude exceeding four times the amplitude of background EMG activity. According to previous findings, REM sleep chin EMG activity was considered to be abnormal when tonic chin EMG density was  $\geq 30\%$  and/or phasic chin EMG density was  $\geq 15\%$ .<sup>10</sup>

### The SINBAR Method

The analysis was made according to previous published data by the SINBAR group,<sup>13,14,16</sup> evaluating chin EMG activity, as tonic, phasic or “any” (either tonic or phasic), and phasic EMG activity at bilateral FDS muscle. Each epoch was scored as “tonic” when the increased sustained EMG activity was present in more than 50% of the 30-second epoch duration with an amplitude at least twice the background EMG muscle tone, or more than 10  $\mu$ V. Phasic EMG activity was scored into 3-second mini-epochs, and was defined as any burst of EMG activity lasting 0.1 to 5 seconds with amplitude exceeding twice the background EMG activity. Phasic chin EMG burst superimposed on a background of tonic activity, during a 3-second mini-epoch, was required to have at least twice the amplitude of the background tonic EMG activity within the same 3-second mini-epoch. Each 3-second mini-epoch was scored having or not “any” EMG activity, when containing either tonic and/or phasic EMG activity within the same mini-epoch, in order to include EMG activity lasting from 5 to 15 seconds, that was not measured in previous method. The percentages of 3-second mini-epochs containing phasic chin EMG activity as well as “any” chin EMG activity, out of the total REM sleep mini-epochs, was calculated. The percentage of 3-second mini-epochs with “any chin EMG activity combined with bilateral phasic FDS EMG activity,” out of the total REM sleep 3-second mini-epochs, was also calculated. The percentage of 30-second epochs containing five or more 3-second mini-epochs with “any chin EMG activity combined with bilateral phasic FDS EMG activity” out of the total REM sleep epochs was calculated. The SINBAR group found the best specificity and sensitivity with the following cut-off values:  $>16.3\%$  of 3-second mini-epochs with phasic chin EMG activity,  $>18\%$  of 3-second mini-epochs with any chin EMG activity,  $>32\%$  of 3-second mini-epochs with any chin EMG activity combined with bilateral phasic EMG activity in the FDS, and  $>27\%$  of 30-second epochs with any chin EMG activity combined with bilateral phasic EMG activity in the FDS.

### RSWA Automatic Scoring (RAI)

The automatic quantification of chin EMG activity was made according to an established automatic scoring algorithm,<sup>18,19,23</sup> by means of the HypnoLab software (SWS-Soft, Italy). The chin EMG signal was digitally band-pass filtered at 10–100

Hz, with a notch filter at 50 Hz and rectified. Each sleep epoch included in the analysis was divided into 1-second mini-epochs, and the average amplitude of the rectified chin EMG signal was obtained for each mini-epoch. After a noise reduction procedure,<sup>18</sup> the values of the chin EMG signal amplitude in each 1-second mini-epoch were used to compute the percentage of values in the following 20 amplitude (amp) classes, expressed in  $\mu$ V:  $\text{amp} \leq 1$ ,  $1 < \text{amp} \leq 2$ , ...,  $18 < \text{amp} \leq 19$ ,  $\text{amp} > 19$ . Muscle atonia is revealed by high values of the first class ( $\text{amp} \leq 1$ ) whereas phasic and tonic activations are expected to increase the value of the other classes.<sup>18,19</sup> An index summarizing in a single value the degree of preponderance of the first class was used in REM sleep:  $\text{RAI} = \text{amp} \leq 1 / (100 - 1 < \text{amp} \leq 2)$ . RAI can vary from 0 (absence of mini-epochs with  $\text{amp} \leq 1$  that is complete absence of EMG atonia) to 1 (all mini-epochs with  $\text{amp} \leq 1$  or stable EMG atonia in the epoch). RAI values  $< 0.8$  are strongly indicative of altered (reduced) chin EMG atonia during REM sleep; while values of RAI between 0.8 and 0.9 indicate a less evident alteration of atonia, and values above 0.9 are characteristic of normal recordings.<sup>18</sup> RAI was computed completely blinded to the results of the manual scoring methods and to the RBD status of the patients.

### Statistical Analysis

Between-group differences on clinical, demographic, and video-PSG features were assessed with the Student's *t* test. Specificity, sensitivity, positive predictive value (PPV), negative predictive value (NPV), and correct classification of RBD were assessed for the following parameters:  $\text{RAI} < 0.8$ , tonic chin EMG density  $\geq 30\%$ , phasic chin EMG density  $\geq 15\%$  (scored in 2-second mini-epoch) and  $\geq 16.3\%$  (scored in 3-second mini-epoch), any chin EMG activity scored in 3-second mini-epoch  $\geq 18\%$ , any 3-second mini-epoch chin EMG combined with bilateral phasic FDS EMG activity  $\geq 32\%$  and any 30-second epoch chin EMG combined with bilateral phasic FDS EMG activity  $\geq 27\%$ . The accuracy of the different parameters to discriminate RBD from no-RBD patients was evaluated using receiver operating characteristic (ROC) curve analysis and the calculation of the area under the curve (AUC). Additionally, the weighted comparison (WC) measure<sup>24</sup> was calculated for any chin EMG combined with bilateral phasic FDS EMG activity  $\geq 27\%$  in 30-second epoch versus all other methods; WC is an index weighting the difference in sensitivity and difference in specificity of two tests, taking into account the relative clinical cost (misclassification costs) of a false positive compared with a false negative diagnosis and disease prevalence. WC was then converted into an equivalent increase in true positive patients per 1000 (if all the benefit is focused into true positive patients) by calculating  $\text{WC} \times \text{prevalence} \times 1000$ . Finally, the extent of the agreement of the different methods was quantified by means of Cohen's K coefficient.

## RESULTS

### Subjects

Of the original 73 patients, four did not have any REM sleep during video-PSG and seven had REM sleep duration shorter than 5 minutes, therefore they were excluded from the study.



The comparison of the three methods was then possible in 62 PD patients (35 male, 27 female, mean age  $64.7 \pm 8.72$  years). RBD was diagnosed in 37 out of 62 of our PD patients (PD-RBD; 59.7%), according to the ICSD-3 criteria,<sup>17</sup> including the presence of  $\geq 27\%$  of 30-second epochs of REM sleep containing any chin EMG activity or bilateral FDS phasic EMG activity. The remaining 25 patients constituted the PD-noRBD group. The clinical and demographic features of our patients are shown in Table 1. There were no significant between-group differences, in age, gender, duration, and severity of PD (assessed by Hoehn & Yahr stage and Unified Parkinson Disease Rating Scale). All patients were taking dopamine replacement therapy ( $n = 61$  levodopa,  $n = 34$  DA), and no difference in LEDD and DA-LEDD was found between the two groups. A total of nine patients were taking drugs known to potentially increase RSWA. More specifically five patients were taking antidepressants (selective serotonin re-uptake inhibitor, SSRI). Among them, three had RBD (two of them developed RBD prior to starting antidepressant therapy) while two didn't have RBD. Four patients (three PD-RBD) were taking beta-blockers, and RBD preceded the initiation of this treatment in two cases. On the other hand, five (three PD-RBD) out of 62 patients were receiving clonazepam, and none was taking melatonin.

## PSG Results

The PSG features are reported in Table 2. There were no significant differences between PD patients with or without RBD for sleep architecture, periodic leg movements index, and apnea/hypopnea index. Only the amount of REM sleep was

significantly lower in the group of PD-RBD patients compared to PD-noRBD.

## Comparison of the Different RSWA Scoring Methods

For the visual scoring, a total of 4777 30-second epochs of REM sleep have been obtained, leading to 47 770 3-second mini-epochs and 71 655 2-second mini-epochs, respectively. Of these, 178 (0.37%) 3-second mini-epochs and 275 (0.38%) 2-second mini-epochs containing arousal-related both EMG activity or movement artifacts were excluded from the analysis. For the automated scoring, a total of 64 (1.34%) 30-second epochs of REM sleep containing artifacts were excluded. Data about EMG tone parameters obtained in PD patients with or without RBD are shown in Table 3. Table 4 summarizes the analysis of the performance of the three methods, one automatic (RAI) and two visual (Montréal, SINBAR), to evaluate RSWA versus the clinical diagnosis of RBD in our patients with PD. The accuracy of both visual methods was high and very similar for those parameters including measures of tonic activities (alone or in combination with phasic activities) that we will call here “tonic” for simplicity. The same was not true for parameters taking into consideration only phasic activities. In particular, the 30-second tonic chin EMG density showed an accuracy of 95.2, an AUC of 0.940, and Cohen's K coefficient of 0.897, as well as the percentage of “any chin EMG activity combined with bilateral phasic EMG activity at FDS,” scored in 30-second epoch. Both of these parameters showed the highest PPV (92.5), NPV (100), sensitivity (100%), and specificity (88%). The percentage of 3-second mini-epochs with “any chin EMG activity” showed an accuracy of 93.5, an AUC of 0.920, a Cohen's K coefficient of 0.862, a sensitivity of 100%, and a specificity of 84%. The percentage of 3-second mini-epochs with “any chin EMG activity

**Table 1**—Clinical and Demographic Features of PD Patients With and Without RBD.

|                | PD-RBD<br>(n = 37) | PD-noRBD<br>(n = 25) | p               |
|----------------|--------------------|----------------------|-----------------|
| Males          | 24 (64.9)          | 11 (44.0)            | NS <sup>a</sup> |
| Age, y         | 66.0 $\pm$ 7.5     | 62.7 $\pm$ 10.1      | NS              |
| Bed partner    | 17 (45.9)          | 11 (44.0)            | NS <sup>a</sup> |
| PD duration, y | 8.2 $\pm$ 4.3      | 8.0 $\pm$ 5.0        | NS              |
| H&Y stage      | 2.2 $\pm$ 0.5      | 2.1 $\pm$ 0.6        | NS              |
| UPDRS III      | 18.1 $\pm$ 11.1    | 16.2 $\pm$ 9.5       | NS              |
| UPDRS-tot      | 35.5 $\pm$ 18.3    | 31.4 $\pm$ 19.4      | NS              |
| LEDD, mg       | 796.2 $\pm$ 486.0  | 704.4 $\pm$ 421.9    | NS              |
| DA-LEDD, mg    | 106.9 $\pm$ 125.9  | 123.9 $\pm$ 139.3    | NS              |
| SSRI           | 3 (8.1)            | 2 (8.0)              | NS <sup>a</sup> |
| Clonazepam     | 2 (5.4)            | 3 (12.0)             | NS <sup>a</sup> |

DA-EDD = Dopamine-agonist equivalent daily dose; H&Y = Hoehn and Yahr; LEDD = Levodopa equivalent daily dose; PD = Parkinson's disease; RBD = REM sleep behavior disorder; SSRI = selective serotonin re-uptake inhibitor; UPDRS III = Unified Parkinson's disease rating scale III. Data are expressed as mean  $\pm$  standard deviation or number(percentage of total).

<sup>a</sup>Fisher-test.<sup>45</sup>

**Table 2**—Polysomnographic Features of PD patients with and without RBD.

|                       | PD-RBD<br>(n = 37) | PD-noRBD<br>(n = 25) | p   |
|-----------------------|--------------------|----------------------|-----|
| Total sleep time, min | 321.5 $\pm$ 82.9   | 326.7 $\pm$ 81.0     | NS  |
| Sleep efficiency, %   | 72.8 $\pm$ 17.3    | 72.1 $\pm$ 18.3      | NS  |
| W, min                | 90.5 $\pm$ 79.5    | 96.5 $\pm$ 77.6      | NS  |
| N1, %                 | 10.4 $\pm$ 8.4     | 8.5 $\pm$ 6.2        | NS  |
| N2, %                 | 58.0 $\pm$ 12.3    | 58.6 $\pm$ 15.7      | NS  |
| N3, %                 | 21.04 $\pm$ 13.0   | 19.1 $\pm$ 11.7      | NS  |
| R, %                  | 10.5 $\pm$ 5.5     | 13.7 $\pm$ 8.2       | NS  |
| R, min                | 34.1 $\pm$ 21.4    | 45.0 $\pm$ 29.8      | .01 |
| PLMS, number          | 123.5 $\pm$ 143.8  | 113.0 $\pm$ 183.0    | NS  |
| PLMS index            | 23.8 $\pm$ 25.7    | 24.5 $\pm$ 44.5      | NS  |
| Apnea/hypopnea index  | 5.5 $\pm$ 9.2      | 2.9 $\pm$ 3.9        | NS  |

PD = Parkinson's disease; PLMS = Periodic leg movements during sleep; RBD = REM sleep behavior disorder. Data are expressed as mean  $\pm$  standard deviation.

combined with bilateral phasic EMG activity at FDS” showed an accuracy of 93.5, a ROC area of 0.933, a Cohen’s K coefficient of 0.866, a sensitivity of 94.6%, and a specificity of 92%. Finally, the percentage of phasic chin EMG activity scored in 2-second mini-epoch and 3-second mini-epoch showed, respectively, an accuracy of 61.3 and 56.5, a ROC area of 0.669 and 0.635, a Cohen’s K coefficient of 0.296 and 0.230, a sensitivity of 37.8% and 27%, and specificity respectively of 96% and 100%. The PPV and the NPV values for the phasic chin EMG activity scored in 2-second mini-epoch were 93.3 and 51.1

respectively, while for the phasic chin EMG activity scored in 3-second mini-epoch was 100 and 48.1 respectively. RAI, with a cut-off value < 0.8, showed an accuracy of 85.5, a ROC area of 0.833, a Cohen’s K coefficient of 0.688, high sensitivity (94.6%), and good specificity (72%), with a PPV of 83.3 and NPV of 90.

Table 4 also reports the WC between the results obtained by the reference method (ie, SINBAR 30-second epochs of REM sleep containing any chin EMG activity or bilateral FDS phasic EMG activity  $\geq 27\%$ ) and all the other methods. A very good agreement with the above measures was found, indicating a substantial equivalence between the reference and the Montréal tonic chin EMG density  $\geq 30\%$ , as well as the SINBAR any chin EMG activity scored in 3-second mini-epochs  $\geq 18\%$ . Surprisingly, the latter seemed to perform slightly better than the reference method using WC, translating into a benefit equivalent of 2 additional true positives  $\times 1000$  cases. Moreover, the reference method showed only a relatively small advantage compared to the RAI, which could be translated into a benefit equivalent of 19 true positives  $\times 1000$  cases.

Table 5 illustrates the agreement (Cohen’s K coefficient) between all possible pairs of measures of RSWA used in this study. The agreement between tonic chin EMG density and the visual parameter “any chin EMG activity combined with bilateral phasic FDS EMG activity in 30-second” was perfect ( $K = 1.000$ ), while the agreement between tonic chin EMG density and the visual parameters “any chin EMG activity, scored in 3-second” and “any chin EMG activity combined with bilateral phasic FDS EMG activity in 3-second” was almost perfect<sup>25</sup> (respectively,  $K = 0.964$  and  $K = 0.897$ ). The agreement between RAI < 0.8 and all visual parameters was substantial ( $K = 0.784$  with tonic chin EMG density,  $K = 0.745$  with any chin EMG activity, scored in 3-second,  $K = 0.688$  any chin EMG activity combined with bilateral phasic FDS EMG activity in 3-second,  $K = 0.784$  any chin EMG activity combined with bilateral phasic FDS EMG activity in 30-second), except

**Table 3—EMG Tone Parameters in PD Patients With or Without RBD.**

|                            | PD-RBD<br>( <i>n</i> = 37) | PD-noRBD<br>( <i>n</i> = 25) | <i>p</i> |
|----------------------------|----------------------------|------------------------------|----------|
| Tonic EMG chin 30 s, %     | 58.5 $\pm$ 20.1            | 10.0 $\pm$ 7.9               | .00001   |
| Phasic EMG 2 s, %          | 8.9 $\pm$ 6.3              | 2.5 $\pm$ 1.5                | .00001   |
| Phasic EMG chin 3 s, %     | 11.8 $\pm$ 8.1             | 3.6 $\pm$ 2.3                | .00001   |
| Any EMG Chin 3 s, %        | 50.6 $\pm$ 18.1            | 12.2 $\pm$ 5.9               | .00001   |
| Any EMG chin + FSD 3 s, %  | 53.5 $\pm$ 16.6            | 15.0 $\pm$ 6.1               | .00001   |
| Any EMG chin + FSD 30 s, % | 60.4 $\pm$ 19.6            | 11.1 $\pm$ 7.2               | .00001   |
| REM atonia index           | 0.442 $\pm$ 0.2            | 0.830 $\pm$ 0.2              | .00001   |
| Tonic EMG chin 30 s, %     | 58.5 $\pm$ 20.1            | 10.0 $\pm$ 7.9               | .00001   |
| Phasic EMG 2 s, %          | 8.9 $\pm$ 6.3              | 2.5 $\pm$ 1.5                | .00001   |
| Phasic EMG chin 3 s, %     | 11.8 $\pm$ 8.1             | 3.6 $\pm$ 2.3                | .00001   |
| Any EMG Chin 3 s, %        | 50.6 $\pm$ 18.1            | 12.2 $\pm$ 5.9               | .00001   |

EMG = electromyography; FSD = flexorum digitorum superficialis; PD = Parkinson’s disease; RBD = REM Sleep Behavior Disorder; REM = Rapid Eye Movements; 30-s = 30 seconds epoch; 2-s = 2 seconds mini-epochs; 3-s = 3 seconds mini-epochs. Data are expressed as mean  $\pm$  standard deviation.

**Table 4—Accuracy of Measures of RSWA, Based on Their Suggested cut-offs, for the Clinical Diagnosis of RBD in PD Patients.**

|                                           | Tonic chin<br>EMG 30 s<br>( $\geq 30\%$ ) | Phasic chin<br>EMG, 2 s<br>( $\geq 15\%$ ) | Phasic chin<br>EMG, 3 s<br>( $\geq 16\%$ ) | Any chin<br>EMG, 3 s<br>( $\geq 18\%$ ) | Any chin EMG +<br>FSD, 3 s ( $\geq 32\%$ ) | Any chin EMG<br>+ FSD, 30 s<br>( $\geq 27\%$ ) | REM Atonia<br>Index 30 s<br>( $< 0.8$ ) |
|-------------------------------------------|-------------------------------------------|--------------------------------------------|--------------------------------------------|-----------------------------------------|--------------------------------------------|------------------------------------------------|-----------------------------------------|
| Sensitivity                               | 100.0                                     | 37.8                                       | 27.0                                       | 100.0                                   | 94.6                                       | 100.0                                          | 94.6                                    |
| Specificity                               | 88.0                                      | 96.0                                       | 100.0                                      | 84.0                                    | 92.0                                       | 88.0                                           | 72.0                                    |
| PPV                                       | 92.5                                      | 93.3                                       | 100.0                                      | 90.2                                    | 94.6                                       | 92.5                                           | 83.3                                    |
| NPV                                       | 100.0                                     | 51.1                                       | 48.1                                       | 100.0                                   | 92.0                                       | 100.0                                          | 90.0                                    |
| Accuracy                                  | 95.2                                      | 61.3                                       | 56.5                                       | 93.5                                    | 93.5                                       | 95.2                                           | 85.5                                    |
| ROC area                                  | 0.940                                     | 0.669                                      | 0.635                                      | 0.920                                   | 0.933                                      | 0.940                                          | 0.833                                   |
| Cohen’s K                                 | 0.897                                     | 0.296                                      | 0.230                                      | 0.862                                   | 0.866                                      | 0.897                                          | 0.688                                   |
| Weighted comparison                       | 0.000                                     | 0.625                                      | 0.730                                      | −0.003                                  | 0.056                                      | Ref.                                           | 0.032                                   |
| Benefit equivalent ( $\times 1000$ cases) | 0                                         | 373                                        | 436                                        | −2                                      | 33                                         | Ref.                                           | 19                                      |

EMG = electromyography; FSD = flexorum digitorum superficialis; NPV = negative predictive value; PD = Parkinson’s disease; PPV = positive predictive value; RBD = REM Sleep Behavior Disorder; Ref. = Reference method; REM = Rapid Eye Movements; ROC = receiver operating characteristic; RSWA = REM sleep Without Atonia.

**Table 5**—Cohen's K (agreement) Between All Possible Pairs of Measures of RSWA.

| Phasic chin EMG, %2 s | Phasic chin EMG, %3 s | Any chin EMG, %3 s | Any chin EMG + FSD, %3 s | Any chin EMG + FSD, %30 s | REM atonia index <0.8 |                            |
|-----------------------|-----------------------|--------------------|--------------------------|---------------------------|-----------------------|----------------------------|
| 0.299                 | 0.191                 | <b>0.964**</b>     | <b>0.897**</b>           | <b>1.000***</b>           | <b>0.784*</b>         | Tonic chin EMG, % 30 s     |
|                       | <b>0.752*</b>         | 0.281              | 0.355                    | 0.299                     | 0.264                 | Phasic chin EMG, % 2 s     |
|                       |                       | 0.179              | 0.230                    | 0.191                     | 0.168                 | Phasic chin EMG, % 3 s     |
|                       |                       |                    | <b>0.862**</b>           | <b>0.964**</b>            | <b>0.745*</b>         | Any chin EMG, % 3 s        |
|                       |                       |                    |                          | <b>0.897**</b>            | <b>0.688*</b>         | Any chin EMG + FSD, % 3 s  |
|                       |                       |                    |                          |                           | <b>0.784*</b>         | Any chin EMG + FSD, % 30 s |

EMG = electromyography; FSD = flexorum digitorum superficialis; REM = Rapid Eye Movements; RSWA = REM sleep Without Atonia.  
Agreement: \*substantial, \*\*almost perfect, \*\*\*perfect.

for phasic parameters. The percentages of 3-second or 2-second mini-epochs containing phasic EMG activity performed worse than the other parameters, showing lowest sensitivity, accuracy, AUC area, and the Cohen's K coefficient, whereas they showed good specificity and good positive predictive value. Also WC between the reference method and the phasic parameters was greatly in favor of the reference method.

## DISCUSSION

The diagnosis of RBD relies on the presence of an excessive muscle tone during REM sleep but the definition of RSWA is still mostly qualitative, based on the scorer's subjective impression, rather than on a clear cut-off value. Recently published ICSD-3 criteria have specified to quantify RSWA "as defined by the guidelines for scoring PSG features of RBD in the most recent version of the AASM Manual for the Scoring of Sleep and Associated Events,"<sup>22</sup> but the latter does not indicate an univocal way to quantify RSWA.<sup>17</sup> However, several methods have been developed to measure EMG activity during REM sleep and detect RSWA, showing good sensitivity and specificity to discriminate RBD from no-RBD patients.<sup>9,10,13,23,26–32</sup> Among them, the ICSD-3<sup>17</sup> indicates the SINBAR<sup>13</sup> method (>27% of 30-second epochs containing any chin EMG activity combined with bilateral phasic EMG activity in the FDS) as one of the most current evidence-based approaches for detecting RSWA in the evaluation of RBD and, for this reason, we used as the reference method for the subsequent comparison with other methods.

In this study, all three scoring methods assessing RSWA in PD, two visual and one automatic, showed high sensitivity, specificity and accuracy, especially "tonic" or "any EMG activity" parameters, while visual parameters considering only "phasic" EMG activities were associated to lower sensitivity and accuracy. First, this study found perfect or almost perfect agreement between the two visual scoring methods, Montréal and SINBAR, when they consider tonic EMG activities alone or in combination with phasic activities, but not when they measure only phasic activities. Moreover, we found a substantial agreement between the automatic scoring method, for example, the RAI, and the Montréal and SINBAR visual scoring methods, when they consider tonic EMG activities alone or in combination with phasic activities, but not when they measure only

phasic activities. These findings confirm previous published data suggesting a good correlation between Montréal method and RAI in patients with idiopathic RBD,<sup>12,19</sup> multiple system atrophy,<sup>19</sup> or narcolepsy.<sup>23</sup>

Visual and automated assessment may differ in some technical aspects, namely the standard of rejection of periods containing artifacts. Indeed, in visual assessment, only mini-epochs containing arousal-related EMG activity are eliminated, while in RAI, 30-second epochs containing major artifacts are excluded, leading to a potential increase in artifact time rejection when assessing RAI that may represent a limitation. However, it has to be pointed out that, in this study, the percentage of rejection was very narrow for both visual and automatic methods (0.4% and 1.3% respectively), making unlikely that this difference would have a significant impact on the results.

It should be pointed out that the diagnosis of RBD was performed according to the ICSD-3 criteria that encompass one of the measures derived from the SINBAR method (namely the percentage of 30-second epochs with any chin EMG activity combined with bilateral phasic FDS EMG activity, with a cut-off value of 27%). Thus, the sensitivity of this particular parameter is necessarily equal to 100% and its performance in accuracy is maximal by definition because of this choice; conversely all the other parameters may be penalized to some extent.

Diagnosing RBD in PD is not a simple task, because of many reasons. First, PD patients with RBD may often have PSG abnormalities either alone (RSWA) or with mild non-clinical behaviors in sleep, such as limb twitching or jerking or simple vocalizations that may go unnoticed by the patient himself, particularly if sleeping alone, or by bed-partners (subclinical RBD<sup>2,33,34</sup>). Moreover, video-behavioral episodes recorded in the sleep lab are often less elaborated and violent compared to those occurring at home, and the minimum amount or duration of video-recorded REM sleep motor behavior required to diagnose RBD is not currently defined.

However, since RBD in PD appears to be associated to a more widespread degenerative process,<sup>35</sup> with a particular increased risk for cognitive decline,<sup>36</sup> the diagnosis of RBD in PD may bear important prognostic and perhaps therapeutic implications in the next future, when disease modifying therapies would hopefully be available. Indeed, at that point, costs and benefits

should be weighted, especially in case of potential severe side effects, and the presence of RBD would represent a strong argument in favor of an eventual disease-modifying strategy.

It has been suggested that the chin EMG alone does not discriminate sufficiently patients from controls. Indeed, in a study on idiopathic RBD, no phasic chin EMG activation was found in 35.5% of the behavioral events observed by video-monitoring, while the simultaneous recording of the mentalis, FDS and extensor digitorum brevis EMG activity was able to detect the highest rates of REM sleep phasic EMG activity, as well as the majority (94.4%) of the motor and vocal manifestations occurring in RBD.<sup>16</sup> The authors thus recommended a montage including both chin and bilateral FDS muscles for the detection of RBD. Following this study, the ICSD-3 indicates a percentage  $\geq 32\%$  of 30-second epochs containing any tonic or phasic chin EMG activity and/or bilateral phasic FDS activity as a reliable way to define RSWA in RBD.

The addition of FDS metrics, in the present study, did not seem to provide an enhanced diagnostic power compared to the assessment of the chin EMG activity alone. Including FDS channels within the routine full PSG montage in PD patients may be time-consuming and add discomfort to the patient. Unless a clear diagnostic benefit is demonstrated from further studies performed by different groups,<sup>13,15</sup> the quantification of FDS activity in the clinical work-up may be questionable, as our findings in patients with PD seem to indicate. On the other hand, recording FDS appears to be of great help in identifying video behavioral episodes when increased phasic EMG activity is observed in these leads on PSG recording.

Our data confirm that the automatic detection of RSWA is highly correlated with manual-visual measures in PD patients. This result is consistent with previous study comparing the RAI with the Montréal visual scoring method.<sup>12</sup> Other studies showed an excellent comparability of the RAI to one visual chin analysis similar to the SINBAR method, assessing directly phasic burst, in PD patients with RBD,<sup>27</sup> or RBD patients with depression,<sup>37</sup> and normal aging.<sup>38</sup> Quantification of RSWA is time-consuming and often unavailable in the clinical practice, while automatic analysis is fast and highly replicable. Furthermore, a limitation of both Montreal and SINBAR visual methods is that they rely on binary measures (ie, positive or negative), while the RAI method, as well as other visual scoring approach,<sup>27</sup> rely on more continuous measures, being more suitable for assessing biological activity like RSWA. On the other hand, the automatic analysis may have some disadvantages, such as incomplete sensitivity in detecting large artifacts, and is not included in most commercial sleep analysis software packages. However, in light of these results, it can be reasonably recommended that, in the clinical practice, automatic assessment of RSWA might be used first, with visual analysis employed when the automatic analysis cannot be applied for technical reasons, or in doubtful cases, together with the visual inspection of video recorded behaviors.

In the present study we found that PD-RBD patients have more “tonic” rather than phasic EMG activity alteration during REM sleep, suggesting a peculiar RBD phenotype in PD. The latter appears to be different from the idiopathic phenotype and from RBD associated with narcolepsy,<sup>23,39</sup> and it seems to be more similar to that found in patients with multiple system

atrophy,<sup>19,40</sup> but perhaps with a lower degree of tonic alteration. Indeed, PD patients with RBD may have milder motor behaviors according to previous findings.<sup>40–43</sup> This may be related to the neurodegenerative process itself, perhaps leading to an impairment of brain structures involved in muscle phasic activity generation. On the other hand, idiopathic RBD patients seeking medical attention are likely to be those with the most violent motor behaviors, and the prevalence of subclinical RBD in the general population is largely unknown. Further studies are warranted to ascertain whether PD patients have a reduced phasic EMG activity or an increased tonic EMG activity, or both, compared to idiopathic RBD.

Our study has some potential limitations. As in a previous paper,<sup>12</sup> we adapted the original “Montreal method” from 20-second to 30-second epochs, according to the current American Sleep Disorders Association (ASDA) recommendations for scoring sleep stages, but we choose to maintain the 2-second mini-epoch approach to score phasic activity. First, one must bear in mind that the choice of epochs length (30-second vs. 20-second) may impact on the tonic metrics, since more than 15 seconds rather than 10 seconds of tonic activity are required to score the whole epoch as “tonic,” potentially leading to lower scores in the tonic activity using 30-second epoch windows compared to 20-second epochs. This has been shown by the works of the SINBAR groups.<sup>13</sup> Second, phasic activity consists in the ratio between the number of phasic mini-epochs and the total number of REM sleep mini-epochs and would not be affected by the epoch length. However, it may be argued that the total amount of 2-second mini-epochs, using 30-second epochs window, may be slightly higher than the one found using 20-second epoch window (because of the possible inclusion of NREM mini-epochs within REM sleep mini-epochs), leading to possible small differences in the 2-second mini-epochs phasic metrics. Nevertheless, the difference was shown to be negligible and not to affect the correct classification of patients and controls in a previous study.<sup>12</sup> On the other hand, it is known that the two different visual methods implying the use of 2-second mini-epochs rather than 3-second, may potentially lead to differences in phasic EMG activity assessment, for example when the same burst of EMG activity overlaps two consecutive mini-epochs in one case and falls within one only mini-epoch in the other case. Indeed, in our study, the percentage of phasic EMG chin activity assessed in 3-second mini-epochs was slightly higher than that of 2-second, as it is illustrated in Table 3. The same can be evicted from past works,<sup>10,13,39,44</sup> although no genuine comparisons can be made between the two methods because of the heterogeneity of the RBD populations included in these studies.

In conclusion, we found a substantial agreement between the automatic method (RAI) and the “tonic” parameters of the two visual methods (Montréal, SINBAR). Therefore, the automatic evaluation of EMG activity during REM sleep, together with visual inspection of video recorded behaviors, may be the first-line method to detect RSWA in PD patients, while visual scoring of RSWA may be useful in doubtful cases. Moreover, a peculiar pattern of REM sleep muscle tone alteration, mainly characterized by an increased tonic, rather than phasic, activity, seems to characterize RBD in PD, in contrast to what observed in both idiopathic and narcolepsy-related RBD.



## REFERENCES

- Schenck CH, Bundlie SR, Ettinger MG, Mahowald MW. Chronic behavioral disorders of human REM sleep: a new category of parasomnia. *Sleep*. 1986; 9(2): 293–308.
- Schenck CH, Mahowald MW. REM sleep behavior disorder: clinical, developmental, and neuroscience perspectives 16 years after its formal identification in SLEEP. *Sleep*. 2002; 25(2): 120–138.
- Boeve BF, Silber MH, Saper CB, et al. Pathophysiology of REM sleep behaviour disorder and relevance to neurodegenerative disease. *Brain*. 2007; 130(pt 11): 2770–2788.
- Postuma RB, Gagnon JF, Vendette M, Montplaisir JY. Markers of neurodegeneration in idiopathic rapid eye movement sleep behaviour disorder and Parkinson's disease. *Brain*. 2009; 132(pt 12): 3298–3307.
- Boeve BF. REM sleep behavior disorder: updated review of the core features, the REM sleep behavior disorder-neurodegenerative disease association, evolving concepts, controversies, and future directions. *Ann N Y Acad Sci*. 2010; 1184: 15–54.
- Iranzo A, Fernández-Arcos A, Tolosa E, et al. Neurodegenerative disorder risk in idiopathic REM sleep behavior disorder: study in 174 patients. *PLoS One*. 2014; 9(2): e89741.
- Iranzo A, Tolosa E, Gelpi E, et al. Neurodegenerative disease status and post-mortem pathology in idiopathic rapid-eye-movement sleep behaviour disorder: an observational cohort study. *Lancet Neurol*. 2013; 12(5): 443–453.
- Postuma RB, Gagnon JF, Vendette M, Montplaisir JY. Idiopathic REM sleep behavior disorder in the transition to degenerative disease. *Mov Disord*. 2009; 24(15): 2225–2232.
- Lapierre O, Montplaisir J. Polysomnographic features of REM sleep behavior disorder: development of a scoring method. *Neurology*. 1992; 42(7): 1371–1374.
- Montplaisir J, Gagnon JF, Fantini ML, et al. Polysomnographic diagnosis of idiopathic REM sleep behavior disorder. *Mov Disord*. 2010; 25(13): 2044–2051.
- Gagnon JF, Bédard MA, Fantini ML, et al. REM sleep behavior disorder and REM sleep without atonia in Parkinson's disease. *Neurology*. 2002; 59(4): 585–589.
- Ferri R, Gagnon JF, Postuma RB, Rundo F, Montplaisir JY. Comparison between an automatic and a visual scoring method of the chin muscle tone during rapid eye movement sleep. *Sleep Med*. 2014; 15(6): 661–665.
- Frauscher B, Iranzo A, Gaig C, et al.; SINBAR (Sleep Innsbruck Barcelona) Group. Normative EMG values during REM sleep for the diagnosis of REM sleep behavior disorder. *Sleep*. 2012; 35(6): 835–847.
- Frauscher B, Iranzo A, Högl B, et al.; SINBAR (Sleep Innsbruck Barcelona group). Quantification of electromyographic activity during REM sleep in multiple muscles in REM sleep behavior disorder. *Sleep*. 2008; 31(5): 724–731.
- Iranzo A, Frauscher B, Santos H, et al.; SINBAR (Sleep Innsbruck Barcelona) Group. Usefulness of the SINBAR electromyographic montage to detect the motor and vocal manifestations occurring in REM sleep behavior disorder. *Sleep Med*. 2011; 12(3): 284–288.
- Frauscher B, Ehrmann L, Högl B. Defining muscle activities for assessment of rapid eye movement sleep behavior disorder: from a qualitative to a quantitative diagnostic level. *Sleep Med*. 2013; 14(8): 729–733.
- International Classification of Sleep Disorders. 3rd ed. Darien, IL: 2014.
- Ferri R, Rundo F, Manconi M, et al. Improved computation of the atonia index in normal controls and patients with REM sleep behavior disorder. *Sleep Med*. 2010; 11(9): 947–949.
- Ferri R, Manconi M, Plazzi G, et al. A quantitative statistical analysis of the submental muscle EMG amplitude during sleep in normal controls and patients with REM sleep behavior disorder. *J Sleep Res*. 2008; 17(1): 89–100.
- Hughes AJ, Daniel SE, Kilford L, Lees AJ. Accuracy of clinical diagnosis of idiopathic Parkinson's disease: a clinico-pathological study of 100 cases. *J Neurol Neurosurg Psychiatry*. 1992; 55(3): 181–184.
- Tomlinson CL, Stowe R, Patel S, Rick C, Gray R, Clarke CE. Systematic review of levodopa dose equivalency reporting in Parkinson's disease. *Mov Disord*. 2010; 25(15): 2649–2653.
- Berry RB, Brooks R, Gamaldo CE, Harding SM, Marcus CL, Vaughn BV. The AASM manual for the scoring of sleep and associated events. Rules Terminol Tech Specif Darien Ill Am Acad Sleep Med. 2012.
- Ferri R, Franceschini C, Zucconi M, et al. Searching for a marker of REM sleep behavior disorder: submental muscle EMG amplitude analysis during sleep in patients with narcolepsy/cataplexy. *Sleep*. 2008; 31(10): 1409–1417.
- Mallett S, Halligan S, Thompson M, Collins GS, Altman DG. Interpreting diagnostic accuracy studies for patient care. *BMJ*. 2012; 345: e3999.
- Landis JR, Koch GG. The measurement of observer agreement for categorical data. *Biometrics*. 1977; 33(1): 159–174.
- Bliwise DL, He L, Ansari FP, Rye DB. Quantification of electromyographic activity during sleep: a phasic electromyographic metric. *J Clin Neurophysiol*. 2006; 23(1): 59–67.
- McCarter SJ, St Louis EK, Duwell EJ, et al. Diagnostic thresholds for quantitative REM sleep phasic burst duration, phasic and tonic muscle activity, and REM atonia index in REM sleep behavior disorder with and without comorbid obstructive sleep apnea. *Sleep*. 2014; 37(10): 1649–1662.
- Mayer G, Kesper K, Ploch T, et al. Quantification of tonic and phasic muscle activity in REM sleep behavior disorder. *J Clin Neurophysiol*. 2008; 25(1): 48–55.
- Bliwise DL, Rye DB. Elevated PEM (phasic electromyographic metric) rates identify rapid eye movement behavior disorder patients on nights without behavioral abnormalities. *Sleep*. 2008; 31(6): 853–857.
- Consens FB, Chervin RD, Koeppel RA, et al. Validation of a polysomnographic score for REM sleep behavior disorder. *Sleep*. 2005; 28(8): 993–997.
- Fulda S, Plazzi G, Ferri R. Scoring atonia during normal and pathological rapid eye movement sleep: visual and automatic quantification methods: Quantification of REM sleep atonia. *Sleep Biol Rhythms* 2013; 11: 40–51.
- Burns JW, Consens FB, Little RJ, Angell KJ, Gilman S, Chervin RD. EMG variance during polysomnography as an assessment for REM sleep behavior disorder. *Sleep*. 2007; 30(12): 1771–1778.
- Nomura T, Inoue Y, Miyake M, Yasui K, Nakashima K. Prevalence and clinical characteristics of restless legs syndrome in Japanese patients with Parkinson's disease. *Mov Disord*. 2006; 21(3): 380–384.
- Schenck CH, Mahowald MW. Subclinical REM sleep behavior disorder and its clinical and research implications. *Sleep*. 2008; 31(12): 1627.
- Ferri R, Cosentino FI, Pizza F, Aricò D, Plazzi G. The timing between REM sleep behavior disorder and Parkinson's disease. *Sleep Breath*. 2014; 18(2): 319–323.
- Anang JB, Gagnon JF, Bertrand JA, et al. Predictors of dementia in Parkinson disease: a prospective cohort study. *Neurology*. 2014; 83(14): 1253–1260.
- McCarter SJ, St Louis EK, Sandness DJ, et al. Antidepressants increase REM sleep muscle tone in patients with and without REM sleep behavior disorder. *Sleep*. 2015; 38(6): 907–917.
- McCarter SJ, St Louis EK, Boeve BF, Sandness DJ, Silber MH. Greatest rapid eye movement sleep atonia loss in men and older age. *Ann Clin Transl Neurol*. 2014; 1(9): 733–738.
- Dauvilliers Y, Rompré S, Gagnon JF, Vendette M, Petit D, Montplaisir J. REM sleep characteristics in narcolepsy and REM sleep behavior disorder. *Sleep*. 2007; 30(7): 844–849.
- Iranzo A, Santamaría J, Rye DB, et al. Characteristics of idiopathic REM sleep behavior disorder and that associated with MSA and PD. *Neurology*. 2005; 65(2): 247–252.
- Frauscher B, Gschliesser V, Brandauer E, et al. Video analysis of motor events in REM sleep behavior disorder. *Mov Disord*. 2007; 22(10): 1464–1470.
- Sixel-Döring F, Schweitzer M, Mollenhauer B, Trenkwalder C. Intraindividual variability of REM sleep behavior disorder in Parkinson's disease: a comparative assessment using a new REM sleep behavior disorder severity scale (RBDSS) for clinical routine. *J Clin Sleep Med*. 2011; 7(1): 75–80.
- Arnulf I. REM sleep behavior disorder: motor manifestations and pathophysiology. *Mov Disord*. 2012; 27(6): 677–689.
- Iranzo A, Molinuevo JL, Santamaría J, et al. Rapid-eye-movement sleep behaviour disorder as an early marker for a neurodegenerative disorder: a descriptive study. *Lancet Neurol*. 2006; 5(7): 572–577.



45. Fisher, RA. On the Interpretation of  $\chi^2$  from Contingency Tables, and the Calculation of P. *J Royal Stat Soc.* 1922; 85: 87–94.

## FUNDING

The study had no financial support.

## ACKNOWLEDGMENTS

This work was performed at the CHU Clermont-Ferrand, Clermont-Ferrand, France, the Sleep Center, Neurophysiology Unit, University of Cagliari, Monserrato (CA), Italy, the Department of Neurology, Oasi Institute for Research on Mental Retardation and Brain Aging (IRCCS), Troina, Italy, and the Department of Neuroscience, University of Turin, Turin.

## SUBMISSION & CORRESPONDENCE INFORMATION

Submitted for publication January, 2016

Submitted in final revised form November, 2016

Accepted for publication November, 2016

Address correspondence to: Maria Livia Fantini, MD, PhD, EEG and Sleep Unit, Neurology Service, CHU Clermont Ferrand, 58 rue Montalembert, 63000 Clermont-Ferrand, France. Telephone: 33-4-73-75-16-66; Fax: 33-4-73-75-16-68; E-mail: [mfantini@chu-clermontferrand.fr](mailto:mfantini@chu-clermontferrand.fr)

## DISCLOSURE STATEMENT

MF, PB, MP, AC, FD, AM, and MLF have indicated no financial conflicts of interest. LL and MZ received honoraria from Medtronics, Abbvie and Lundbeck, not related to the present article. RF consulted for EB Neuro, with potential relationship with the present paper.
